# Supplementary material
Source: publisher figshare collection journal article supplement (https://geolsoc.figshare.com/ndownloader/files/30841403)
Supplement: Supplementary file 1 [file 30841403]

## Sheet: Sheet1
Table S1: Sample information.
SampleID	depth from [m]	depth to [m]	lithology
Well Geryon-2, NCB, (long 114.87793, lat. -19.9535)
TR-3	3194.58	3194.69	sh
TR-8	3155.78	3155.86	sh
TR-12	3125.35	3125.44	sst/sh
TR-14	3108.72	3108.8	sst/sh
TR-18	3084.78	3084.85	sst
TR-21	3041.77	3041.88	sst + sh
TR-23	3029.48	3029.58	sh
TR-24*	3018.58	3018.66	sst
TR-27	3002.36	3002.46	sst
TR-30	2962	2962.1	sst
TR-31*	2956.57	2956.66	sst
Well Yodel-1, NCB, (long 115.720276, lat. -19.744552)
TR-51	3011.14	3011.21	sst
TR-52	3002.46	3002.55	sst
TR-60a	2961.2	2961.32	sst
TR-60b	2961.2	2961.32	sst
TR-61*	2962	2962.05	sh
NCB: Northern Carnarvon Basin, sst: sandstone, sh: shale. *: samples exluded from zircon size analysis due to low yields.
